# Supplementary material for: Aerobic Exercise Training and In Vivo Akt Activation Counteract Cancer Cachexia by Inducing a Hypertrophic Profile through eIF-2α Modulation
Source: MDPI journal article supplement (doi:10.3390/cancers14010028), 2021-12-22

1 – Uncropped western blot of Figure 2 – Aerobic exercise training delays cancer cachexia progression.

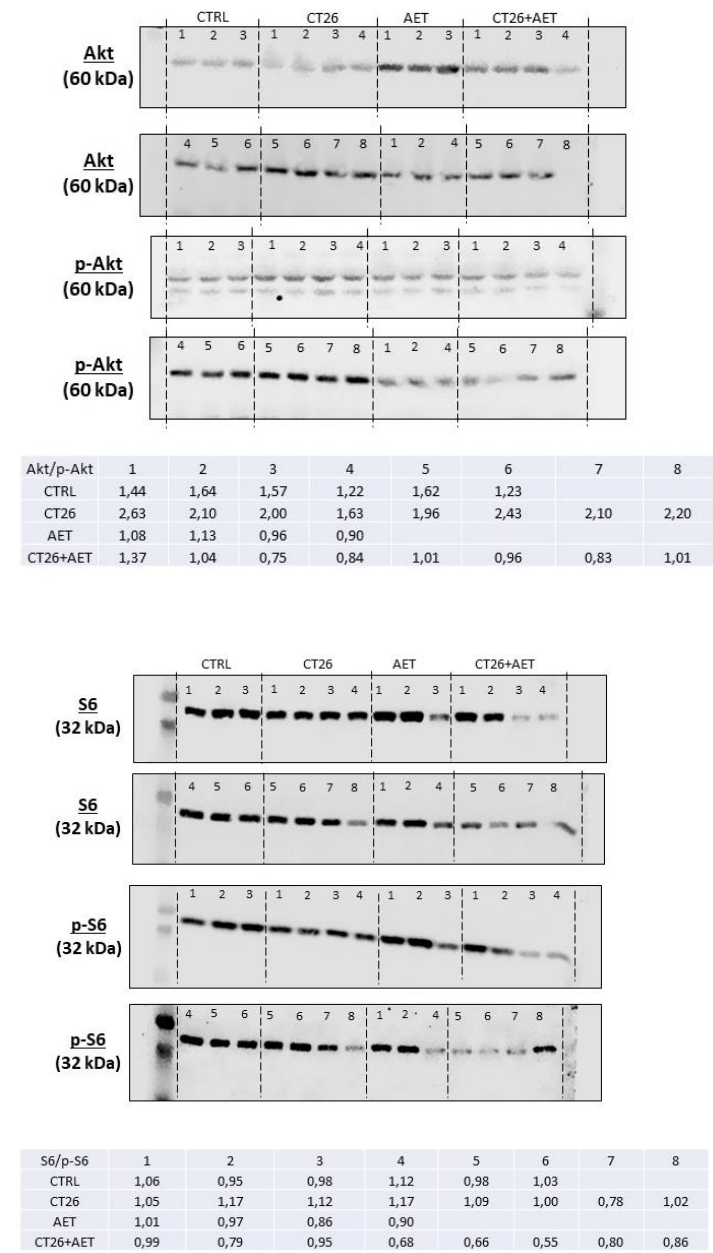

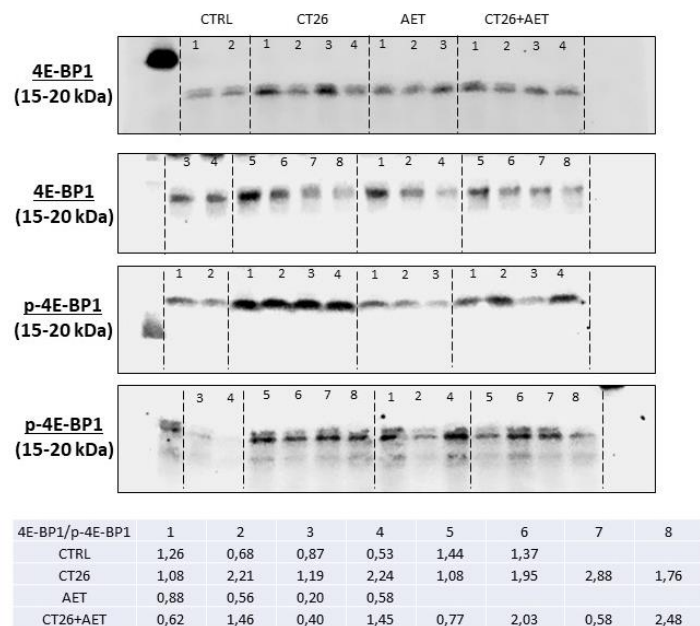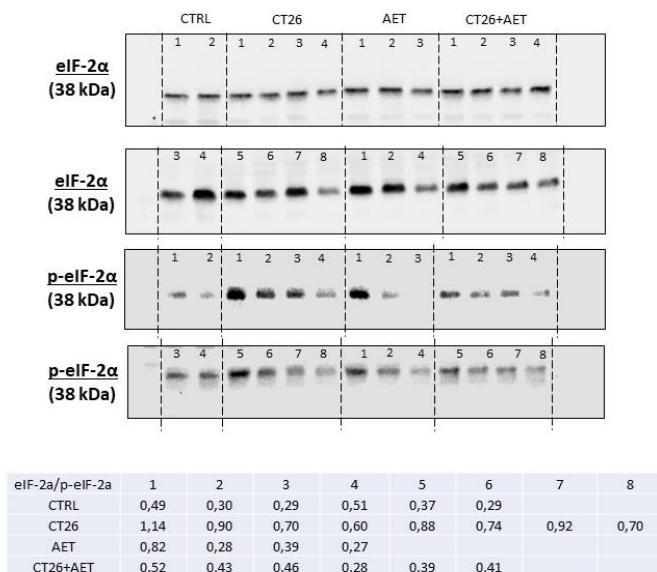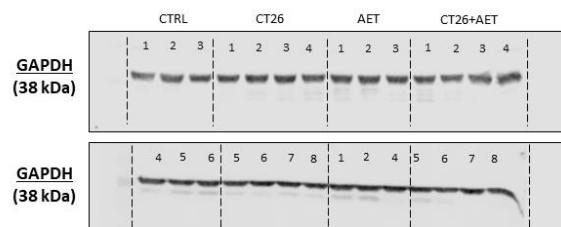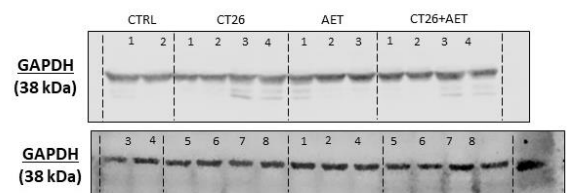

2 – Uncropped western blot of Figure S2 – Single exercise session indicates a better translation initiation process as a possible mechanism to control cancer-related muscle wasting.

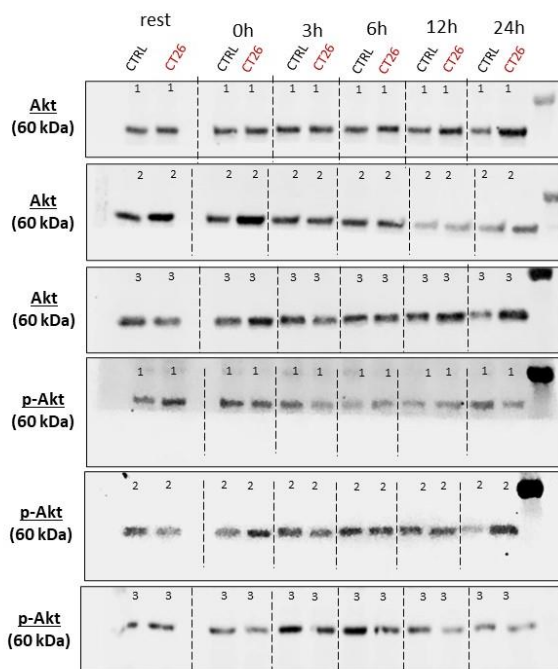

| Akt/p-Akt | rest |      | 0h   |      | 3h   |      | 6h   |      | 12h  |      | 24h  |      |
|-----------|------|------|------|------|------|------|------|------|------|------|------|------|
|           | CTRL | CT26 | CTRL | CT26 | CTRL | CT26 | CTRL | CT26 | CTRL | CT26 | CTRL | CT26 |
| 1         | 1,23 | 1,82 | 1,56 | 1,18 | 1,15 | 0,79 | 0,85 | 0,95 | 1,11 | 0,85 | 1,95 | 0,48 |
| 2         | 0,90 | 1,82 | 1,42 | 0,60 | 0,99 | 0,75 | 0,68 | 0,91 | 2,57 | 2,16 | 2,21 | 1,05 |
| 3         | 0,93 | 0,77 | 0,82 | 0,93 | 1,06 | 1,07 | 1,29 | 1,36 | 1,29 | 0,88 | 0,80 | 1,00 |

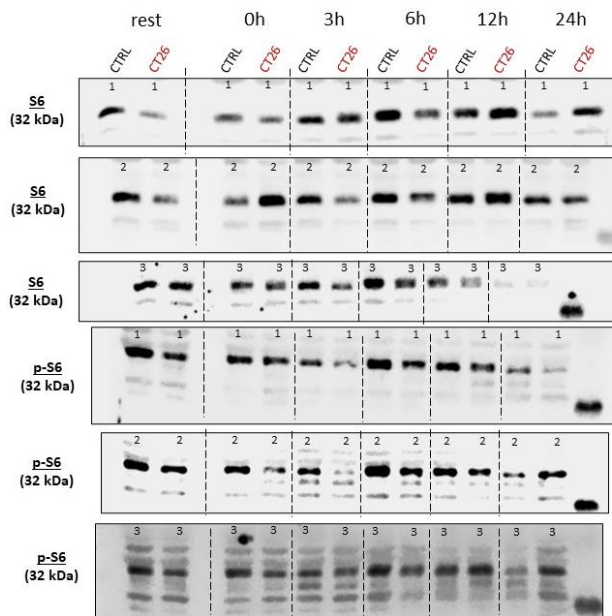

| S6/p-S6 | rest |      | 0h   |      | 3h   |      | 6h   |      | 12h  |      | 24h  |      |
|---------|------|------|------|------|------|------|------|------|------|------|------|------|
|         | CTRL | CT26 | CTRL | CT26 | CTRL | CT26 | CTRL | CT26 | CTRL | CT26 | CTRL | CT26 |
| 1       | 1,48 | 2,22 | 1,76 | 0,70 | 0,70 | 0,92 | 1,11 | 1,17 | 0,98 | 0,62 | 2,22 | 1,42 |
| 2       | 2,08 | 1,20 | 1,18 | 0,70 | 0,72 | 0,92 | 0,93 | 0,40 | 0,73 | 0,23 | 3,43 | 0,52 |
| 3       | 1,19 | 0,78 | 1,03 | 0,58 | 0,91 | 0,46 | 1,13 | 1,05 | 1,24 | 1,50 | 2,83 | 0,97 |

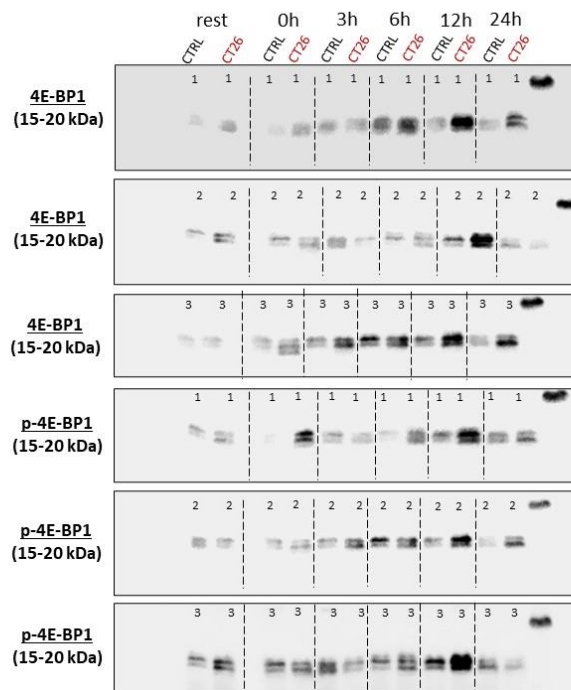

| 4E-BP1/p-4E-BP1 |  | rest |      | 0h   |      | 3h   |      | 6h   |      | 12h  |      | 24h  |      |
|-----------------|--|------|------|------|------|------|------|------|------|------|------|------|------|
|                 |  | CTRL | CT26 | CTRL | CT26 | CTRL | CT26 | CTRL | CT26 | CTRL | CT26 | CTRL | CT26 |
| 1               |  | 2,60 | 1,25 | 0,75 | 3,52 | 1,00 | 0,76 | 0,85 | 0,57 | 1,80 | 0,94 | 2,12 | 0,70 |
| 2               |  | 2,78 | 2,15 | 0,25 | 0,72 | 0,58 | 0,62 | 2,00 | 1,09 | 2,25 | 2,02 | 1,80 | 1,14 |
| 3               |  | 2,86 | 1,45 | 0,72 | 2,05 | 2,35 | 0,70 | 3,17 | 2,76 | 2,03 | 1,17 | 2,38 | 0,62 |

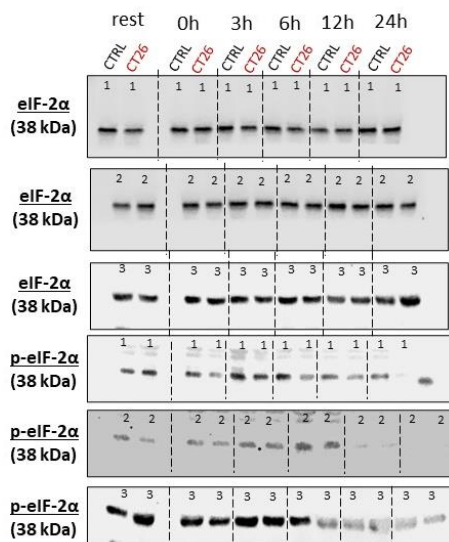

| eIF-2α/p-eIF-2α |  | rest |      | 0h   |      | 3h   |      | 6h   |      | 12h  |      | 24h  |      |
|-----------------|--|------|------|------|------|------|------|------|------|------|------|------|------|
|                 |  | CTRL | CT26 | CTRL | CT26 | CTRL | CT26 | CTRL | CT26 | CTRL | CT26 | CTRL | CT26 |
| 1               |  | 0,30 | 0,75 | 0,50 | 0,20 | 0,80 | 0,63 | 0,60 | 0,25 | 0,50 | 0,25 | 0,36 | 0,03 |
| 2               |  | 0,53 | 0,74 | 0,57 | 0,30 | 0,80 | 0,56 | 0,74 | 0,35 | 0,40 | 0,28 | 0,46 | 0,06 |
| 3               |  | 0,41 | 0,75 | 0,53 | 0,25 | 0,80 | 0,59 | 0,67 | 0,30 | 0,45 | 0,26 | 0,41 | 0,04 |

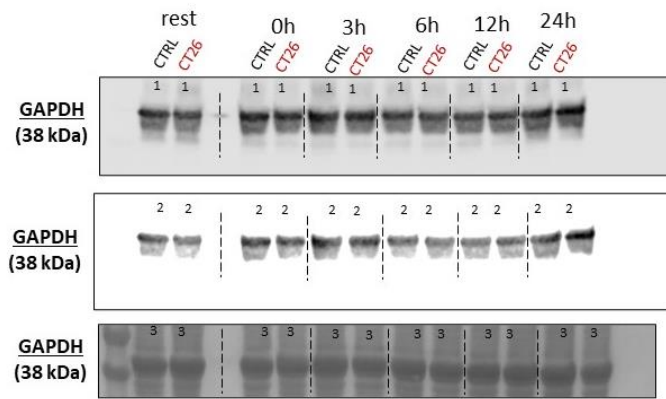

3 – Uncropped western blot of Figure 4 – Functional and hypertrophic adaptations induced by the Akt activation in cachectic muscles.

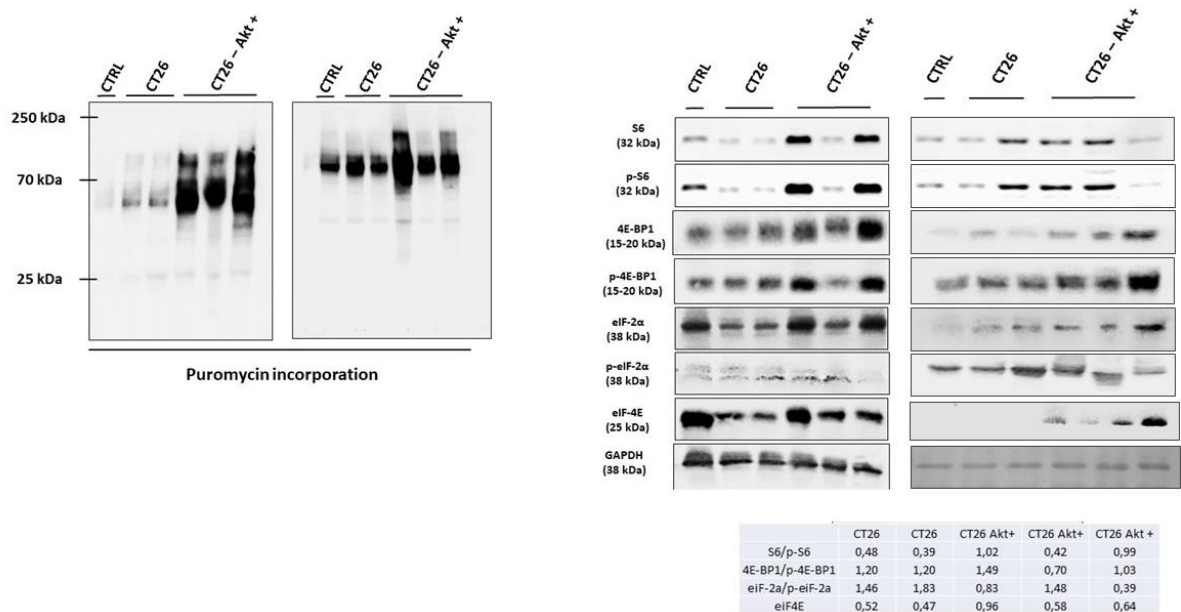

Supplement: s1 [file s1]
